# Supplementary material
Source: publisher site journal article supplement (https://jamanetwork.com/journals/JAMA/articlepdf/2616395/joi170024supp1_prod.pdf)
Supplement: Supplementary file 1 [file joi170024supp1_prod.pdf]

## Supplementary Online Content

Paige NM, Miake-Lye IM, Booth MS, et al. Association of spinal manipulative therapy with clinical benefit and harm for acute low back pain: systematic review and meta-analysis. *JAMA*. doi:10.1001/jama.2017.3086

**eAppendix.** Systematic Review Search Strategies

**eTable 1.** Evidence Table of 26 Randomized Clinical Trials of Spinal Manipulative Therapy for Acute Low Back Pain

**eTable 2.** Quality Scores of 26 Randomized Clinical Trials of Spinal Manipulation Therapy for Acute Low Back Pain

**eReferences**

This supplementary material has been provided by the authors to give readers additional information about their work.

## **eAppendix. Systematic review search strategies**

### SEARCH STRATEGY FOR "CHIROPRACTIC" SYSTEMATIC REVIEWS

#### DATABASE SEARCHED:

Cochrane Database of Systematic Reviews and Other Reviews

NO DATE OR LANGUAGE LIMITATIONS

#### SEARCH STRATEGY:

'chiroprac\*' in Title, Abstract, Keywords  
Cochrane Reviews (17)  
Other Reviews (44)

#### SEARCH STRATEGY:

"Manipulation, Spinal"

---

Cochrane Databased Search Strategy #2:

spine or spinal or neck or back or cervi\*  
and  
(smt or manipulat\* or chiropract\*):ti,ab,kw

Dates:

2011-present,

Limit to the Cochrane Systematic Reviews, Other Reviews (DARE), Technology Assessments, and Economic Evaluations databases.

---

Forward search on:

Hurwitz EL, Aker PD, Adams AH, Meeker WC, Shekelle PG. Manipulation and mobilization of the cervical spine. A systematic review of the literature. Spine (Phila Pa 1976). Aug 1 1996;21(15):1746-1759; discussion 1759-1760.

## **2. Update Search Strategies**

### SPINAL MANIPULATION THERAPY – 2015 UPDATE SEARCH METHODOLOGY

#### DATABASE SEARCHED & TIME PERIOD COVERED:

COCHRANE CENTRAL – 1/1/2011-2/06/2017

#### SEARCH STRATEGY:

#1 MeSH descriptor: [Back] explode all trees

#2 MeSH descriptor: [Buttocks] this term only

#3 MeSH descriptor: [Leg] this term only

#4 MeSH descriptor: [Back Pain] explode all trees

#5 MeSH descriptor: [Back Pain] 1 tree(s) exploded

#6 MeSH descriptor: [Back Injuries] explode all trees

#7 MeSH descriptor: [Low Back Pain] this term only

#8 MeSH descriptor: [Sciatica] this term only

© 2017 American Medical Association. All rights reserved.

#9 low next back next pain

#10 lbp

#11 #1 or #2 or #3 or #5 or #6 or #7 or #8 or #9 or #10

#12 MeSH descriptor: [Musculoskeletal Manipulations] explode all trees

#13 MeSH descriptor: [Chiropractic] explode all trees

#14 manip\*

#15 MeSH descriptor: [Osteopathic Medicine] explode all trees

#16 osteopath\*

#17 chiropract\*

#18 #12 or #13 or #14 or #15 or #16 or #17

#19 #11 and #18

=====  
DATABASE SEARCHED & TIME PERIOD COVERED:  
MEDLINE ON OVID – 1/1/2011-2/06/2017

SEARCH STRATEGY:

1 Clinical Trial.pt.

2 randomized.ab,ti.

3 placebo.ab,ti.

4 dt.fs.

5 randomly.ab,ti.

6 trial.ab,ti.

7 groups.ab,ti.

8

1 or 2 or 3 or 4 or 5 or 6 or 7

9 Animals/

10 Humans/

11

9 not (9 and 10) Including Related Terms

12

© 2017 American Medical Association. All rights reserved.

8 not 11

13 dorsalgia.ti,ab.

14 exp Back Pain/

15 backache.ti,ab.

16 (lumbar adj pain).ti,ab.

17 coccyx.ti,ab.

18 coccydynia.ti,ab.

19 sciatica.ti,ab.

20 sciatica/

21 spondylosis.ti,ab.

22 lumbago.ti,ab.

23 exp low back pain/

24

13 or 14 or 15 or 16 or 17 or 18 or 19 or 20 or 21 or 22 or 23

25 exp Manipulation, Chiropractic/

26 exp Manipulation, Orthopedic/

27 exp Manipulation, Osteopathic/

28 exp Manipulation, Spinal/

29 exp Musculoskeletal Manipulations/

30 exp Chiropractic/

31 manipulation.mp.

32 manipulate.mp.

33 exp Orthopedics/

34 exp Osteopathic Medicine/

35

25 or 26 or 27 or 28 or 29 or 30 or 31 or 32 or 33 or 34

36

12 and 24 and 35

37

36 and 2011:2015.(sa\_year).

=====

DATABASE SEARCHED & TIME PERIOD COVERED:  
EMBASE – 1/1/2011-2/06/2017

SEARCH STRATEGY:

#2 'clinical article'/exp OR 'clinical study'/exp OR 'clinical trial'/de OR 'controlled study'/de OR 'randomized controlled trial'/de OR 'major clinical study'/de OR 'double blind procedure'/de OR 'multicenter study'/de OR 'single blind procedure'/de OR 'phase 3 clinical trial'/de OR 'phase 4 clinical trial'/de OR 'crossover procedure'/de OR 'placebo'/de

#6 allocat\*

#7 assign\*

#8 blind\*

#12 clinical NEAR/25 (study OR trial\*)

#13 compar\*

#14 control\*

#17 'cross over'

#18 'cross-over'

#19 'crossover'

#20 factorial

#21 'follow up'

#22 follow\* NEAR/3 up

#23 'follow up'

#24 placebo\*

#25 prospectiv\*

#26 random\*

#27 (singl\* OR doubl\* OR trebl\* OR tripl\*) NEAR/25 (blind\* OR mask\*)

#28 trial

#29 versus OR vs

#30

#6 OR #7 OR #8 OR #12 OR #13 OR #14 OR #17 OR #18 OR #19 OR #20 OR #21 OR #22 OR #23

OR #24 OR #25 OR #26 OR #27 OR #28 OR #29

#31

#2 OR #30

© 2017 American Medical Association. All rights reserved.

#34 dorsalgia

#35 'back pain'

#36 lumbar NEAR/2 pain

#37 coccyx

#38 coccydynia

#39 sciatica

#40 spondylosis

#41 lumbago

#42 'backache'/exp OR 'ischialgia'/exp OR 'low back pain'/exp

#43

#34 OR #35 OR #36 OR #37 OR #38 OR #39 OR #40 OR #41 OR #42

#44 'chiropractic'/exp OR 'orthopedic manipulation'/exp OR 'manipulative medicine'/exp OR 'osteopathic medicine'/exp OR 'orthopedics'/exp

#45 manipulation

#46 manipulate

#47 osteopathy

#48

#44 OR #45 OR #46 OR #47

#49

#31 AND #43 AND #48

#50

#31 AND #43 AND #48 AND [humans]/lim

#51

#31 AND #43 AND #48 AND [humans]/lim AND [2011-2015]/py

=====  
DATABASE SEARCHED & TIME PERIOD COVERED:  
CINAHL – 1/1/2011-2/06/2017

SEARCH STRATEGY:

Search modes - Find all search terms (For all search statements)

S1 randomized controlled trials

S2 randomized controlled trials

S3 PT clinical trial

© 2017 American Medical Association. All rights reserved.

S4 (MH "Clinical Trials+")

S5 clin\* n25 trial\*

S6 (singl\* or doubl\* or trebl\* or tripl\*) n25 (blind\* or mask\*)

S7 (MH "Placebos")

S8 (MH "Study Design+")

S9 (MH "Comparative Studies")

S10 (MH "Evaluation Research+")

S11 (MH "Prospective Studies+")

S12 "follow up studies" OR "follow-up studies" OR "followup studies" OR "follow-up study" OR "follow up study" OR "followup study"

S13 control\* or prospectiv\* or volunteer\*

S14 placebo\* OR random\* OR (latin n2 square\*)

S15

S2 OR S3 OR S4 OR S5 OR S6 OR S7 OR S8 OR S9 OR S10 OR S11 OR S12 OR S13 OR S14

S18 TI dorsalgia OR AB dorsalgia

S19 (MH "Back Pain+")

S20 TI backache OR AB backache

S21 TI lumbar n2 pain OR AB lumbar n2 pain

S22 TI coccyx pain OR AB lumbar n2 pain

S23 TI coccyx OR AB coccyx

S24 TI coccydynia OR AB coccydynia

S25 TI sciatica OR AB sciatica

S26 (MH "Sciatica")

S27 TI spondylosis OR AB spondylosis

S28 TI lumbago cronico OR AB spondylosis

S29 TI lumbago OR AB lumbago

S30 (MH "Low Back Pain")

S31

S18 OR S19 OR S20 OR S21 OR S22 OR S23 OR S24 OR S25 OR S26 OR S27 OR S28 OR  
S29  
OR S30

S32 (MH "Chiropractic+")

S33 (MH "Manipulation, Chiropractic")

S34 (MH "Manipulation, Orthopedic")

S35 (MH "Manipulation, Osteopathic")

S36 (MH "Manual Therapy+")

S37 (MH "Orthopedics")

S38 (MH "Osteopathy+")

S39 manipulation

S40 manipulate

S41

S32 OR S33 OR S34 OR S35 OR S36 OR S37 OR S38 OR S39 OR S40

S42

s15 AND S31 AND S41

S43

S15 AND S31 AND S41

DATABASE SEARCHED & TIME PERIOD COVERED:

PubMed – 1/1/2015-2/06/2017

SEARCH STRATEGY:

Manipulation, Chiropractic[mh] OR Manipulation, Orthopedic[mh] OR Manipulation,  
Osteopathic[mh] OR Manipulation, Spinal[mh] OR Musculoskeletal Manipulations[mh] OR  
Chiropractic[mh] OR Orthopedics OR Osteopathic Medicine  
AND

"Low Back Pain"[Mesh] OR low back pain\*[tiab] OR "Back"[Mesh] OR dorsalgia[tiab] OR Back  
Pain[mh] OR backache[tiab] OR "lumbar pain"[tiab] OR coccyx[tiab] OR coccydynia[tiab] OR  
sciatica[tiab] OR sciatica[mh] OR spondylosis[tiab] OR lumbago[tiab]

AND

Randomized Controlled Trial" [Publication Type] OR "Randomized Controlled Trials as  
Topic"[Mesh] OR random\*[tiab] OR rct\* OR systematic[tiab] OR systematic[sb] OR Clinical  
Trial[pt] OR randomized[tiab] OR placebo[tiab] OR randomly[tiab] OR trial[tiab] OR groups[tiab]



**eTable 1. Evidence table of 26 randomized clinical trials of spinal manipulative therapy for acute low back pain**

| Author, Year                                | Setting      | % Male   | Mean Age | Presence of Leg Pain or Sciatica                                               | Outcome                            | Baseline value   | Treatment arms                                                                                                                                 | Sample Size | Follow-up                                                                    |
|---------------------------------------------|--------------|----------|----------|--------------------------------------------------------------------------------|------------------------------------|------------------|------------------------------------------------------------------------------------------------------------------------------------------------|-------------|------------------------------------------------------------------------------|
| Bergquist-Ullman, et al., 1977 <sup>1</sup> | Industry     | 87% male | 34 years | 14% of patients had a straight leg raise test positive at less than 60 degrees | Pain index                         | 43               | back school (instruction and exercise)                                                                                                         | N=44        | 10 day median: 20<br>3 week median: 19<br>6 week median: 22                  |
|                                             |              |          |          |                                                                                |                                    | 42               | non-thrust manipulation                                                                                                                        | N=50        | 10 day median: 22<br>3 week median: 18<br>6 week median: 21                  |
|                                             |              |          |          |                                                                                |                                    | 42               | diathermy according to Cyriax, Kaltenborn, Lewit, and Janda                                                                                    | N=56        | 10 day median: 28<br>3 week median: 25<br>6 week median: 17                  |
| Blomberg, et al., 1994 <sup>2,6</sup>       | Primary care | 52% male | 37 years | 10% with "true radicular pain"                                                 | Disability Rating Score (function) | No baseline data | usual medical care                                                                                                                             | N=48        | 3 days mean: 4.6<br>1 week mean: 3.9<br>2 week mean: 3.2<br>3 week mean: 3   |
|                                             |              |          |          |                                                                                |                                    |                  | mix of thrust and non-thrust manipulation, some patients also got steroid injections of the parasacroccygeal structures as described by Cyriax | N=53        | 3 days mean: 3.5<br>1 week mean: 2.6<br>2 week mean: 1.8<br>3 week mean: 1.4 |
|                                             |              |          |          |                                                                                | Pain score                         |                  | usual medical care                                                                                                                             | N=48        | 3 days mean: 4.8<br>1 week mean: 4.2<br>2 week mean: 3.4<br>3 week mean: 3.4 |
|                                             |              |          |          |                                                                                |                                    |                  | mix of thrust and non-thrust manipulation, some patients also got steroid injections of the parasacroccygeal structures as described by Cyriax | N=53        | 3 days mean: 3.8<br>1 week mean: 3.1<br>2 week mean: 2<br>3 week mean: 1.7   |

eTable 1. Evidence table of 26 randomized clinical trials of spinal manipulative therapy for acute low back pain (continued)

| Author, Year                       | Setting                                                    | % Male   | Mean Age     | Presence of Leg Pain or Sciatica                   | Outcome                                           | Baseline value       | Treatment arms                                                                                                                        | Sample Size | Follow-up                             |
|------------------------------------|------------------------------------------------------------|----------|--------------|----------------------------------------------------|---------------------------------------------------|----------------------|---------------------------------------------------------------------------------------------------------------------------------------|-------------|---------------------------------------|
| Cherkin, et al., 1998 <sup>7</sup> | Primary care patients from health maintenance organization | 52% male | 41 years     | Sciatica excluded                                  | Roland Morris Disability questionnaire (function) | 12.1 (CI: 11.2-13.1) | thrust manipulation                                                                                                                   | N=122       | 4 week mean: 3.7 (2.9 SD)             |
|                                    |                                                            |          |              |                                                    |                                                   | 11.7 (CI: 10.4-13.0) | physical therapy according to McKenzie                                                                                                | N=136       | 4 week mean: 4.1 (3.3 SD)             |
|                                    |                                                            |          |              |                                                    |                                                   | 11.7 (CI: 10.4-13.0) | educational booklet                                                                                                                   | N=66        | 4 week mean: 4.9 (3.8 SD)             |
|                                    |                                                            |          |              |                                                    | Bothersomeness of symptoms (pain)                 | 5.5 (CI: 5.1-5.8)    | thrust manipulation                                                                                                                   | N=122       | 4 week mean: 1.9 (1.5 SD)             |
|                                    |                                                            |          |              |                                                    |                                                   | 6 (CI: 5.6-6.5)      | physical therapy according to McKenzie                                                                                                | N=136       | 4 week mean: 2.3 (1.9 SD)             |
|                                    |                                                            |          |              |                                                    |                                                   | 5.3 (CI: 4.9-5.7)    | educational booklet                                                                                                                   | N=66        | 4 week mean: 3.1 (2.4 SD)             |
| Childs, et al., 2004 <sup>8</sup>  | 8 physical therapy clinics in the United States            | 58% male | 34 years     | 24% had "symptoms distal to knee"                  | Oswestry disability questionnaire (function)      | 41.4 (10.1 SD)       | thrust manipulation                                                                                                                   | N=70        | 1 week mean: 14.6<br>4 week mean: 8.4 |
|                                    |                                                            |          |              |                                                    |                                                   | 40.9 (10.8 SD)       | low stress aerobic exercise and lumbar spine strengthening program according to Agency for Health Care Policy and Research guidelines | N=61        | 1 week mean: 35<br>4 week mean: 23    |
| Cramer, et al., 1993 <sup>9</sup>  | Clinical chiropractic college                              | 57% male | Not reported | Patients with "compressive neuropathy" we excluded | Visual Analogue Scale (pain)                      | 71.8 (14.8 SD)       | non-thrust manipulation and electrical stimulation and cold pack                                                                      | N=17        | 10 day mean: 38.6 (25.2 SD)           |
|                                    |                                                            |          |              |                                                    |                                                   | 72 (19.2 SD)         | detuned ultrasound and cold pack                                                                                                      | N=18        | 10 day mean: 42 (28.8 SD)             |
|                                    |                                                            |          |              |                                                    | Oswestry disability questionnaire (function)      | 17.6 (11.9 SD)       | non-thrust manipulation and electrical stimulation and cold pack                                                                      | N=17        | 10 day mean: 7.3 (6.8 SD)             |
|                                    |                                                            |          |              |                                                    |                                                   | 14.9 (5.0 SD)        | detuned ultrasound and cold pack                                                                                                      | N=18        | 10 day mean: 8.0 (7.6 SD)             |

eTable 1. Evidence table of 26 randomized clinical trials of spinal manipulative therapy for acute low back pain (continued)

| Author, Year                        | Setting                         | % Male   | Mean Age | Presence of Leg Pain or Sciatica | Outcome                                           | Baseline value | Treatment arms                                                                                                                              | Sample Size | Follow-up                                       |
|-------------------------------------|---------------------------------|----------|----------|----------------------------------|---------------------------------------------------|----------------|---------------------------------------------------------------------------------------------------------------------------------------------|-------------|-------------------------------------------------|
| Cruser, et al., 2012 <sup>10</sup>  | United States military facility | 55% male | 27 years | Not reported                     | Visual Analogue Scale (pain)                      | 5.2 (2.1 SD)   | mix of thrust and non-thrust manipulation, soft tissue stretching, myofascial release, counterstrain muscle energy, sacroiliac articulation | N=30        | 4 week mean: 2.0 (1.5 SD)                       |
|                                     |                                 |          |          |                                  |                                                   | 5.5 (2.2 SD)   | usual medical care                                                                                                                          | N=30        | 4 week mean: 3.7 (2.4 SD)                       |
|                                     |                                 |          |          |                                  | Roland Morris Disability questionnaire (function) | 12.4 (5.3 SD)  | mix of thrust and non-thrust manipulation, soft tissue stretching, myofascial release, counterstrain muscle energy, sacroiliac articulation | N=30        | 4 week mean: 4.4 (5.9 SD)                       |
|                                     |                                 |          |          |                                  |                                                   | 12.5 (6.0 SD)  | usual medical care                                                                                                                          | N=30        | 4 week mean: 7.31 (6.3 SD)                      |
| Delitto, et al., 1993 <sup>11</sup> | Physiotherapy department        | 58% male | 33 years | 21% had "leg symptoms"           | Oswestry disability questionnaire (function)      | 33 (5 SD)      | thrust manipulation and extension exercises according to McKenzie and hand-heel rock exercise                                               | N=14        | 3 day mean: 20 (5 SD)<br>5 day mean: 10 (5 SD)  |
|                                     |                                 |          |          |                                  |                                                   | 41 (5 SD)      | flexion exercises according to Williams                                                                                                     | N=10        | 3 day mean: 36 (5 SD)<br>5 day mean: 32 (4 SD)  |
| Erhard, et al., 1994 <sup>12</sup>  | Physiotherapy department        | 62% male | 44 years | 8% had "leg symptoms"            | Oswestry disability questionnaire (function)      | 45 (12 SD)     | thrust manipulation and extension exercises according to McKenzie                                                                           | N=12        | 3 day mean: 20 (8 SD)<br>5 day mean: 8 (8 SD)   |
|                                     |                                 |          |          |                                  |                                                   | 40 (12 SD)     | extension exercises according to McKenzie                                                                                                   | N=12        | 3 day mean: 35 (8 SD)<br>5 day mean: 25 (14 SD) |
| Farrell, et al., 1982 <sup>13</sup> | Setting unclear                 | 62% male | 42 years | Not reported                     | Subjective pain rating                            | 4.95           | non-thrust manipulation according to Stoddart and Maitland                                                                                  | N=24        | 3 week mean: 0.3                                |
|                                     |                                 |          |          |                                  |                                                   | 5.3            | physical therapy and diathermy, isometric abdominal exercises and ergonomic instructions                                                    | N=24        | 3 week mean: 0.3                                |

eTable 1. Evidence table of 26 randomized clinical trials of spinal manipulative therapy for acute low back pain (continued)

| Author, Year                        | Setting                             | % Male       | Mean Age | Presence of Leg Pain or Sciatica                                            | Outcome                                                                              | Baseline value   | Treatment arms                                  | Sample Size | Follow-up                         |
|-------------------------------------|-------------------------------------|--------------|----------|-----------------------------------------------------------------------------|--------------------------------------------------------------------------------------|------------------|-------------------------------------------------|-------------|-----------------------------------|
| Fritz, et al., 2015 <sup>14</sup>   | Primary care                        | 48% male     | 37 years | Patients with presence of pain or numbness distal to the knee were excluded | Numeric pain rating of low back pain severity                                        | no baseline data | thrust manipulation and exercises               | N=108       | 4 week mean: 1.7 (1.9 SD)         |
|                                     |                                     |              |          |                                                                             |                                                                                      | no baseline data | standard medical care and self-help booklet     | N=112       | 4 week mean: 2.1 (1.9 SD)         |
|                                     |                                     |              |          |                                                                             | Oswestry disability questionnaire (function)                                         | no baseline data | thrust manipulation and exercises               | N=108       | 4 week mean: 11.1 (12.5 SD)       |
|                                     |                                     |              |          |                                                                             |                                                                                      | no baseline data | standard medical care and self-help booklet     | N=112       | 4 week mean: 14.5 (13.2 SD)       |
| Glover, et al., 1974 <sup>15</sup>  | Work medical center                 | 89% male     | 39 years | Not reported                                                                | Percent pain relief                                                                  | no baseline data | diathermy                                       | N=41        | 3 day mean: 56<br>1 week mean: 80 |
|                                     |                                     |              |          |                                                                             |                                                                                      | no baseline data | non-thrust manipulation                         | N=43        | 3 day mean: 50<br>1 week mean: 75 |
| Godfrey, et al., 1984 <sup>16</sup> | Patients referred from primary care | Not reported | 42 years | Not reported                                                                | General symptomatology (number of patients with marked improvement) (pain)           | no baseline data | thrust manipulation according to Maigne         |             | 2-3 week: 14/39 (35.9%)           |
|                                     |                                     |              |          |                                                                             |                                                                                      | no baseline data | light effleurage and minimal electrostimulation |             | 2-3 week: 7/33 (21.2%)            |
|                                     |                                     |              |          |                                                                             | Activities of Daily Living (number of patients with moderate improvement) (function) | no baseline data | thrust manipulation according to Maigne         |             | 2-3 week: 7/24 (29.2%)            |
|                                     |                                     |              |          |                                                                             |                                                                                      | no baseline data | light effleurage and minimal electrostimulation |             | 2-3 week: 5/17 (29.4%)            |

eTable 1. Evidence table of 26 randomized clinical trials of spinal manipulative therapy for acute low back pain (continued)

| Author, Year                             | Setting                                                                    | % Male   | Mean Age     | Presence of Leg Pain or Sciatica | Outcome                                           | Baseline value       | Treatment arms                                                                                                                    | Sample Size | Follow-up                            |
|------------------------------------------|----------------------------------------------------------------------------|----------|--------------|----------------------------------|---------------------------------------------------|----------------------|-----------------------------------------------------------------------------------------------------------------------------------|-------------|--------------------------------------|
| Goertz, et al., 2013 <sup>17</sup>       | United States army medical center                                          | 86% male | 26 years     | 43% had "radicular signs"        | Numerical pain rating scale                       | 5.8 (2.1 SD)         | standard medical care and brief massage, ice or heat, McKenzie exercises, stretching exercises                                    | N=46        | 2 week mean: 6.1<br>4 week mean: 5.2 |
|                                          |                                                                            |          |              |                                  |                                                   | 5.8 (1.5 SD)         | thrust manipulation                                                                                                               | N=45        | 2 week mean: 3.9<br>4 week mean: 3.9 |
|                                          |                                                                            |          |              |                                  | Roland Morris Disability questionnaire (function) | 12.7 (5.1 SD)        | standard medical care and brief massage, ice or heat, McKenzie exercises, strengthening exercises                                 | N=46        | 2 week mean: 12.9<br>4 week mean: 12 |
|                                          |                                                                            |          |              |                                  |                                                   | 11 (4.2 SD)          | thrust manipulation                                                                                                               | N=45        | 2 week mean: 8.9<br>4 week mean: 8   |
| Grunnesjo, et al., 2004 <sup>18-20</sup> | Nine primary health care and one outpatient orthopedic hospital department | 56% male | 41 years     | 8% had "verified herniations"    | Pain last 24 hours                                | 52.2 (CI: 46.7-57.8) | stay active                                                                                                                       | N=71        | 5 week mean: 29.7 (25.8 SD)          |
|                                          |                                                                            |          |              |                                  |                                                   | 54.7 (CI: 49.8-59.6) | mix of thrust and non-thrust manipulation and stay active and in some patients a steroid injection in the parasacroccygeal region | N=89        | 5 week mean: 20.8 (23.3 SD)          |
|                                          |                                                                            |          |              |                                  | All disability rating variables                   | 52 (CI: 47.4-56.6)   | stay active                                                                                                                       | N=71        | 5 week mean: 31.9 (21.9 SD)          |
|                                          |                                                                            |          |              |                                  |                                                   | 57.8 (CI: 53.7-61.8) | mix of thrust and non-thrust manipulation and stay active and in some patients a steroid injection in the parasacroccygeal region | N=89        | 5 week mean: 25.8 (22.1 SD)          |
| Hadler, et al., 1987 <sup>21</sup>       | Primary care                                                               | 57% male | Not reported | Not reported                     | Roland Morris Disability questionnaire (function) | no baseline data     | mobilization                                                                                                                      | N=28        | 9 day mean: 4.5<br>12 day mean: 3.7  |
|                                          |                                                                            |          |              |                                  |                                                   | no baseline data     | thrust manipulation                                                                                                               | N=26        | 9 day mean: 3.7<br>12 day mean: 3.4  |

© 2017 American Medical Association. All rights reserved.

eTable 1. Evidence table of 26 randomized clinical trials of spinal manipulative therapy for acute low back pain (continued)

| Author, Year                            | Setting                                           | % Male   | Mean Age | Presence of Leg Pain or Sciatica                        | Outcome                                                                                       | Baseline value   | Treatment arms                   | Sample Size | Follow-up                                                                                                                       |
|-----------------------------------------|---------------------------------------------------|----------|----------|---------------------------------------------------------|-----------------------------------------------------------------------------------------------|------------------|----------------------------------|-------------|---------------------------------------------------------------------------------------------------------------------------------|
| Hallegraeff, et al., 2009 <sup>22</sup> | Three physical therapy and manual therapy centers | 55% male | 39 years | Patients with symptoms distal to the knee were excluded | Oswestry disability questionnaire (function)                                                  | 0.24 (0.18 SD)   | thrust manipulation              | N=31        | 2.5 week mean: 0.14 (0.17 SD)                                                                                                   |
|                                         |                                                   |          |          |                                                         |                                                                                               | 0.26 (0.12 SD)   | physical therapy                 | N=33        | 2.5 week mean: 0.14 (0.12 SD)                                                                                                   |
|                                         |                                                   |          |          |                                                         | Visual Analogue Scale (pain)                                                                  | 42.7 (18.4 SD)   | thrust manipulation              | N=31        | 2.5 week mean: 19 (16.9 SD)                                                                                                     |
|                                         |                                                   |          |          |                                                         |                                                                                               | 54 (17.5 SD)     | physical therapy                 | N=33        | 2.5 week mean: 24.8 (20.1 SD)                                                                                                   |
| Hancock, et al., 2007 <sup>23</sup>     | Patients referred from primary care               | 56% male | 41 years | Patients with "nerve root compromise" were excluded     | Numerical pain rating scale<br>negative effect size favors manipulation                       | no baseline data | non-thrust manipulation          | N=59        | 1 week effect size: 0.2 (CI: -0.3-0.7)<br>2 week effect size: -0.4 (CI: -1.0, 0.1)<br>4 week effect size: -0.2 (CI: -0.7, 0.3)  |
|                                         |                                                   |          |          |                                                         |                                                                                               | no baseline data | detuned pulsed ultrasound (sham) | N=60        |                                                                                                                                 |
|                                         |                                                   |          |          |                                                         |                                                                                               | no baseline data | non-thrust manipulation          | N=59        | 1 week effect size: -0.7 (CI: -2.1, 0.6)<br>2 week effect size: -1.4 (CI: -2.7, -0.1)<br>4 week effect size: -1 (CI: -2.1, 0.1) |
|                                         |                                                   |          |          |                                                         | Roland Morris Disability questionnaire (function)<br>negative effect size favors manipulation | no baseline data | detuned pulsed ultrasound (sham) | N=60        |                                                                                                                                 |
|                                         |                                                   |          |          |                                                         |                                                                                               | no baseline data | non-thrust manipulation          | N=59        | 1 week effect size: -0.7 (CI: -2.1, 0.6)<br>2 week effect size: -1.4 (CI: -2.7, -0.1)<br>4 week effect size: -1 (CI: -2.1, 0.1) |
|                                         |                                                   |          |          |                                                         |                                                                                               | no baseline data | detuned pulsed ultrasound (sham) | N=60        |                                                                                                                                 |
| Heymann, et al., 2013 <sup>24</sup>     | 5 orthopedic or general practices                 | 60% male | 37 years | Not reported                                            | Roland Morris Disability questionnaire (function)                                             | 13.5 (5.6 SD)    | thrust manipulation              | N=38        | 1 week mean: 5.8                                                                                                                |
|                                         |                                                   |          |          |                                                         |                                                                                               | 14.4 (4.8 SD)    | analgesic (diclofenac)           | N=37        | 1 week mean: 9.7                                                                                                                |
|                                         |                                                   |          |          |                                                         |                                                                                               | 15 (3.8 SD)      | sham                             | N=25        | no data provided                                                                                                                |
|                                         |                                                   |          |          |                                                         | Visual Analogue Scale (pain)                                                                  | no baseline data | thrust manipulation              | N=38        | 1 week mean: 10                                                                                                                 |
|                                         |                                                   |          |          |                                                         |                                                                                               | no baseline data | analgesic                        | N=37        | 1 week mean: 30                                                                                                                 |
|                                         |                                                   |          |          |                                                         |                                                                                               | no baseline data | sham                             | N=25        | 1 week mean: no data provided                                                                                                   |

eTable 1. Evidence table of 26 randomized clinical trials of spinal manipulative therapy for acute low back pain (continued)

| Author, Year                        | Setting                                                           | % Male   | Mean Age | Presence of Leg Pain or Sciatica                                            | Outcome                                                  | Baseline value | Treatment arms                                                      | Sample Size           | Follow-up                                                  |
|-------------------------------------|-------------------------------------------------------------------|----------|----------|-----------------------------------------------------------------------------|----------------------------------------------------------|----------------|---------------------------------------------------------------------|-----------------------|------------------------------------------------------------|
| Hoiriis, et al., 2004 <sup>25</sup> | Patients recruited via advertisement                              | 57% male | 42 years | Patients with "known or suspected disk herniation" were excluded            | Visual Analogue Scale (pain)                             | 4.52 (1.82 SD) | thrust manipulation                                                 | N=34                  | 2 week mean: 2.4 (2.2 SD)<br>4 week mean: 1.7 (1.9 SD)     |
|                                     |                                                                   |          |          |                                                                             |                                                          | 3.9 (2.0 SD)   | muscle relaxants (cyclobenzaprine or carisoprodol or methocarbamol) | N=36                  | 2 week mean: 2.7 (2.2 SD)<br>4 week mean: 2.2 (2.2 SD)     |
|                                     |                                                                   |          |          |                                                                             |                                                          | 3.8 (1.6 SD)   | sham                                                                | N=40                  | 2 week mean: 3.2 (2.4 SD)<br>4 week mean: 2.2 (2.0 SD)     |
|                                     |                                                                   |          |          |                                                                             | Oswestry disability questionnaire (function)             | 24.8 (11.5 SD) | thrust manipulation                                                 | N=46                  | 2 week mean: 17.0 (13.8 SD)<br>4 week mean: 11.9 (11.9 SD) |
|                                     |                                                                   |          |          |                                                                             |                                                          | 22.8 (12.9 SD) | muscle relaxants (cyclobenzaprine or carisoprodol or methocarbamol) | N=47                  | 2 week mean: 17.0 (12.2 SD)<br>4 week mean: 16.0 (16.1 SD) |
|                                     |                                                                   |          |          |                                                                             |                                                          | 24.8 (11.7 SD) | sham                                                                | N=48                  | 2 week mean: 19.3 (13.7 SD)<br>4 week mean: 16.3 (12.6 SD) |
| Juni, et al., 2009 <sup>26</sup>    | Patients referred from emergency department or a general practice | 64% male | 35 years | Patients with "signs of nerve root irritation or compression" were excluded | Roland Morris Disability questionnaire (function)        | 12.8 (5.1 SD)  | Mix of thrust and non-thrust manipulation                           | N=52<br>12.8 (5.1 SD) | 2 week mean: 5.8 (5.7 SD)                                  |
|                                     |                                                                   |          |          |                                                                             |                                                          | 14.3 (4.9 SD)  | analgesic (paracetamol, diclofenac, or dihydrocodeine)              | N=52                  | 2 week mean: 5.2 (7.0 SD)                                  |
|                                     |                                                                   |          |          |                                                                             | Pain intensity, BS-11 score positive favors manipulation | 6.3 (2.2 SD)   | mix of thrust and non-thrust manipulation                           | N=52                  | Difference of 0.5 (2.6 SD)                                 |
|                                     |                                                                   |          |          |                                                                             |                                                          | 6.8 (2.2 SD)   | Analgesic (paracetamol, diclofenac, or dihydrocodeine)              | N=52                  |                                                            |

eTable 1. Evidence table of 26 randomized clinical trials of spinal manipulative therapy for acute low back pain (continued)

| Author, Year                          | Setting                             | % Male   | Mean Age     | Presence of Leg Pain or Sciatica                               | Outcome                                           | Baseline value | Treatment arms                                                                            | Sample Size | Follow-up                                                                                                              |
|---------------------------------------|-------------------------------------|----------|--------------|----------------------------------------------------------------|---------------------------------------------------|----------------|-------------------------------------------------------------------------------------------|-------------|------------------------------------------------------------------------------------------------------------------------|
| MacDonald, et al., 1990 <sup>27</sup> | General practice                    | 41% male | Not reported | Patients with "neurologic deficits" were excluded              | Improvement in the disability index               | 6.4 (3 SD)     | thrust manipulation and advice on posture, exercises and avoidance of occupational stress | N=36        | 2 week mean: 4.1 (3.5 SD)                                                                                              |
|                                       |                                     |          |              |                                                                |                                                   | 6.1 (2.5 SD)   | advice on posture, exercise, and avoidance of occupational stress                         | N=30        | 2 week mean: 4.4 (3.5 SD)                                                                                              |
| Morton, 1999 <sup>28</sup>            | Patients referred from primary care | 34% male | 44 years     | Patients with "abnormalities on neurologic exam" were excluded | Roland Morris Disability questionnaire (function) | 10.6 (5.2 SD)  | thrust manipulation                                                                       | N=15        | 1 week mean: 6.9 (4.1 SD)<br>2 week mean: 6.0 (2.3 SD)<br>3 week mean: 3.7 (3.7 SD)<br>4 week mean: 1.9 (2.5 SD)       |
|                                       |                                     |          |              |                                                                |                                                   | 10.1 (6.4 SD)  | spinal stabilizing exercises                                                              | N=14        | 1 week mean: 9.1 (5.9 SD)<br>2 week mean: 7.9 (6.3 SD)<br>3 week mean: 7 (6.1 SD)<br>4 week mean: 6 (5.2 SD)           |
|                                       |                                     |          |              |                                                                | Visual Analogue Scale (pain)                      | 49.7 (23.6 SD) | thrust manipulation                                                                       | N=15        | 1 week mean: 27.6 (15.2 SD)<br>2 week mean: 17.4 (13.9 SD)<br>3 week mean: 7.5 (6.4 SD)<br>4 week mean: 2.4 (3 SD)     |
|                                       |                                     |          |              |                                                                |                                                   | 46.6 (25.1 SD) | spinal stabilizing exercises                                                              | N=14        | 1 week mean: 46.4 (23.3 SD)<br>2 week mean: 36.6 (24.6 SD)<br>3 week mean: 34.5 (23 SD)<br>4 week mean: 25.4 (17.3 SD) |



eTable 1. Evidence table of 26 randomized clinical trials of spinal manipulative therapy for acute low back pain (continued)

| Author, Year                            | Setting                                                   | % Male       | Mean Age | Presence of Leg Pain or Sciatica                     | Outcome                                                   | Baseline value                                                            | Treatment arms                                                    | Sample Size         | Follow-up                                    |                                              |
|-----------------------------------------|-----------------------------------------------------------|--------------|----------|------------------------------------------------------|-----------------------------------------------------------|---------------------------------------------------------------------------|-------------------------------------------------------------------|---------------------|----------------------------------------------|----------------------------------------------|
| Postacchini, et al., 1988 <sup>29</sup> | Hospital outpatient department                            | 51% male     | 38 years | Not reported                                         | Improvement in low back pain from pre-treatment           | no baseline data                                                          | thrust manipulation                                               | N=53                | 3 week mean: 8.5                             |                                              |
|                                         |                                                           |              |          |                                                      |                                                           | no baseline data                                                          | back school                                                       | N=17                | 3 week mean: 10.4                            |                                              |
|                                         |                                                           |              |          |                                                      |                                                           | no baseline data                                                          | analgesics (diclofenac)                                           | N=49                | 3 week mean: 9.4                             |                                              |
|                                         |                                                           |              |          |                                                      |                                                           | no baseline data                                                          | physiotherapy of light massage, analgesic currents, and diathermy | N=47                | 3 week mean: 8.1                             |                                              |
|                                         |                                                           |              |          |                                                      |                                                           | no baseline data                                                          | bed rest                                                          | N=29                | 3 week mean: 6.6                             |                                              |
|                                         |                                                           |              |          |                                                      |                                                           | no baseline data                                                          | topical gel                                                       | N=46                | 3 week mean: 5.8                             |                                              |
| Rasmussen, 1979 <sup>30</sup>           | Hospital department of physical medicine and rheumatology | Not reported | 35 years | Patients with "signs of root pressure" were excluded | Number of patients with total restoration of all symptoms | no baseline data                                                          | non-thrust manipulation                                           | N=12                | 11/12 (91.7%)                                |                                              |
|                                         |                                                           |              |          |                                                      |                                                           | no baseline data                                                          | diathermy                                                         | N=12                | 3/12 (25%)                                   |                                              |
| Skargren, et al., 1998 <sup>31</sup>    | Primary care centers                                      | 38% male     | 41 years | Not reported                                         | Visual Analogue Scale (pain) negative favors manipulation | 56 (22 SD)                                                                | thrust manipulation                                               | N=172               | 4-5 week difference: -0.16 (CI: -6.47, 6.15) |                                              |
|                                         |                                                           |              |          |                                                      |                                                           | 61 (21 SD)                                                                | physiotherapy                                                     | N=144               |                                              |                                              |
|                                         |                                                           |              |          |                                                      |                                                           | Oswestry disability questionnaire (function) negative favors manipulation | 35 (17 SD)                                                        | thrust manipulation | N=172                                        | 4-5 week difference: -1.49 (CI: -5.51, 2.54) |
|                                         |                                                           |              |          |                                                      |                                                           |                                                                           | 37 (16 SD)                                                        | physiotherapy       | N=144                                        |                                              |

eTable 1. Evidence table of 26 randomized clinical trials of spinal manipulative therapy for acute low back pain (continued)

| Author, Year                           | Setting          | % Male   | Mean Age | Presence of Leg Pain or Sciatica | Outcome                                            | Baseline value   | Treatment arms                                                                      | Sample Size | Follow-up         |
|----------------------------------------|------------------|----------|----------|----------------------------------|----------------------------------------------------|------------------|-------------------------------------------------------------------------------------|-------------|-------------------|
| Waterworth, et al., 1985 <sup>32</sup> | General practice | 62% male | 36 years | Not reported                     | Score of lower back pain                           | 2.1              | non-thrust manipulation                                                             | N=38        | 12 day mean: 0.42 |
|                                        |                  |          |          |                                  |                                                    | 2.1              | analgesic (diflunisal)                                                              | N=36        | 12 day mean: 0.44 |
|                                        |                  |          |          |                                  |                                                    | 2                | physiotherapy including local heat, ultrasound, and flexion and extension exercises | N=34        | 12 day mean: 0.38 |
|                                        |                  |          |          |                                  | Patient has overall improvement score of excellent | no baseline data | non-thrust manipulation                                                             | N=38        | 23/38 (60.5%)     |
|                                        |                  |          |          |                                  |                                                    | no baseline data | analgesic (diflunisal)                                                              | N=36        | 15/36 (41.7%)     |
|                                        |                  |          |          |                                  |                                                    | no baseline data | physiotherapy including local heat, ultrasound, and flexion and extension exercises | N=34        | 13/34 (38.2%)     |

**eTable 2. Quality scores of 26 randomized clinical trials of spinal manipulative therapy for acute low back pain**

| Article                                 | Randomization | Concealment | Blinding, provider | Blinding, patient | Blinding, outcome | Dropouts | Timing | Intention to Treat | Baseline Differences | Co-interventions | Compliance | Total |
|-----------------------------------------|---------------|-------------|--------------------|-------------------|-------------------|----------|--------|--------------------|----------------------|------------------|------------|-------|
| Bergquist-Ullman, M., 1977 <sup>1</sup> | +             | ?           | -                  | -                 | -                 | -        | +      | -                  | ?                    | ?                | -          | 2     |
| Blomberg, S., 1994 <sup>2</sup>         | +             | +           | -                  | -                 | -                 | +        | -      | +                  | -                    | +                | +          | 6     |
| Cherkin, D. C., 1998 <sup>7</sup>       | +             | +           | -                  | -                 | -                 | +        | +      | +                  | +                    | -                | ?          | 6     |
| Childs, J. D., 2004 <sup>8</sup>        | +             | +           | -                  | -                 | -                 | +        | +      | +                  | +                    | ?                | +          | 7     |
| Cramer, G. D., 1993 <sup>9</sup>        | ?             | ?           | -                  | -                 | -                 | +        | +      | +                  | ?                    | ?                | ?          | 3     |
| Cruser, A., 2012 <sup>10</sup>          | ?             | +           | -                  | -                 | -                 | +        | +      | +                  | +                    | +                | +          | 7     |
| Delitto, A., 1993 <sup>11</sup>         | +             | -           | -                  | -                 | ?                 | ?        | +      | +                  | +                    | ?                | ?          | 4     |
| Erhard, R. E., 1994 <sup>12</sup>       | +             | ?           | -                  | -                 | ?                 | -        | +      | -                  | +                    | ?                | ?          | 3     |
| Farrell, J. P., 1982 <sup>13</sup>      | ?             | ?           | -                  | -                 | -                 | +        | +      | ?                  | +                    | ?                | ?          | 3     |
| Fritz, J. M., 2015 <sup>14</sup>        | +             | +           | -                  | -                 | -                 | +        | +      | +                  | +                    | -                | +          | 7     |
| Glover, J. R., 1974 <sup>15</sup>       | +             | ?           | -                  | -                 | -                 | ?        | +      | ?                  | ?                    | ?                | ?          | 2     |
| Godfrey, C. M., 1984 <sup>16</sup>      | +             | ?           | -                  | +                 | +                 | -        | +      | -                  | ?                    | +                | +          | 6     |
| Goertz, C. M., 2013 <sup>17</sup>       | +             | +           | -                  | -                 | -                 | -        | +      | +                  | +                    | +                | +          | 7     |
| Grunnesjö, M. I., 2004 <sup>18-20</sup> | +             | +           | -                  | -                 | -                 | +        | +      | +                  | +                    | ?                | +          | 7     |
| Hadler, N. M., 1987 <sup>21</sup>       | ?             | ?           | -                  | +                 | -                 | +        | +      | -                  | -                    | ?                | ?          | 3     |
| Hallegraeff, J. M., 2009 <sup>22</sup>  | +             | +           | -                  | -                 | -                 | +        | +      | +                  | -                    | ?                | +          | 6     |
| Hancock, M. J., 2007 <sup>23</sup>      | +             | +           | -                  | +                 | -                 | +        | +      | +                  | +                    | +                | +          | 9     |
| Heymann, W. J., 2013 <sup>24</sup>      | ?             | +           | -                  | +                 | +                 | -        | +      | +                  | +                    | ?                | ?          | 6     |
| Hoiriis, K. T., 2004 <sup>25</sup>      | +             | ?           | -                  | -                 | -                 | -        | +      | +                  | ?                    | ?                | ?          | 3     |
| Juni, P., 2009 <sup>26</sup>            | +             | +           | -                  | -                 | -                 | +        | +      | +                  | ?                    | +                | +          | 7     |
| MacDonald, R. S., 1990 <sup>27</sup>    | ?             | ?           | -                  | -                 | -                 | +        | +      | -                  | +                    | ?                | +          | 4     |
| Morton, J. E., 1999 <sup>28</sup>       | +             | -           | -                  | -                 | -                 | ?        | +      | +                  | ?                    | ?                | ?          | 3     |
| Postacchini, F., 1988 <sup>29</sup>     | ?             | ?           | -                  | -                 | -                 | +        | +      | -                  | ?                    | -                | ?          | 2     |
| Rasmussen, G., 1979 <sup>30</sup>       | ?             | ?           | -                  | -                 | -                 | +        | +      | -                  | ?                    | ?                | ?          | 2     |
| Skargren, E. I., 1998 <sup>31</sup>     | ?             | ?           | -                  | -                 | -                 | -        | +      | -                  | +                    | -                | ?          | 2     |
| Waterworth, R. F., 1985 <sup>32</sup>   | +             | ?           | -                  | -                 | -                 | +        | +      | -                  | ?                    | ?                | ?          | 3     |

\* +=yes, -=no, ?=unsure/don't know; full criteria specified in Cochrane Back Group Risk of Bias Tool.<sup>33</sup>

## eReferences

1. Bergquist-Ullman M, Larsson U. Acute low back pain in industry. A controlled prospective study with special reference to therapy and confounding factors. *Acta Orthop Scand*. 1977(170):1-117.
2. Blomberg S, Svardsudd K, Tibblin G. A randomized study of manual therapy with steroid injections in low-back pain. Telephone interview follow-up of pain, disability, recovery and drug consumption. *Eur Spine J*. 1994;3(5):246-254.
3. Blomberg S, Hallin G, Grann K, Berg E, Sennerby U. Manual therapy with steroid injections--a new approach to treatment of low back pain. A controlled multicenter trial with an evaluation by orthopedic surgeons. *Spine (Phila Pa 1976)*. 1994;19(5):569-577.
4. Blomberg S, Svardsudd K, Mildenerger F. A controlled, multicentre trial of manual therapy in low-back pain. Initial status, sick-leave and pain score during follow-up. *Scand J Prim Health Care*. 1992;10(3):170-178.
5. Blomberg S, Tibblin G. A controlled, multicentre trial of manual therapy with steroid injections in low-back pain: functional variables, side effects and complications during four months follow-up. *Clinical Rehabilitation*. 1993;7(1):49-62.
6. Blomberg S, Svardsudd K, Tibblin G. Manual therapy with steroid injections in low-back pain. Improvement of quality of life in a controlled trial with four months' follow-up. *Scand J Prim Health Care*. 1993;11(2):83-90.
7. Cherkin DC, Deyo RA, Battie M, Street J, Barlow W. A comparison of physical therapy, chiropractic manipulation, and provision of an educational booklet for the treatment of patients with low back pain. *N Engl J Med*. 1998;339(15):1021-1029.
8. Childs JD, Fritz JM, Flynn TW, et al. A clinical prediction rule to identify patients with low back pain most likely to benefit from spinal manipulation: a validation study. *Ann Intern Med*. 2004;141(12):920-928.
9. Cramer GD, Humphreys CR, Hondras MA, McGregor M, Triano JJ. The Hmax/Mmax ratio as an outcome measure for acute low back pain. *J Manipulative Physiol Ther*. 1993;16(1):7-13.
10. Crusier A, Maurer D, Hensel K, Brown SK, White K, Stoll ST. A randomized, controlled trial of osteopathic manipulative treatment for acute low back pain in active duty military personnel. *Journal of manual & manipulative therapy*. 2012;20(1):5-15.  
<http://onlinelibrary.wiley.com/o/cochrane/clcentral/articles/708/CN-00897708/frame.html>.
11. Delitto A, Cibulka MT, Erhard RE, Bowling RW, Tenhula JA. Evidence for use of an extension-mobilization category in acute low back syndrome: a prescriptive validation pilot study. *Phys Ther*. 1993;73(4):216-222; discussion 223-218.
12. Erhard RE, Delitto A, Cibulka MT. Relative effectiveness of an extension program and a combined program of manipulation and flexion and extension exercises in patients with acute low back syndrome. *Phys Ther*. 1994;74(12):1093-1100.
13. Farrell JP, Twomey LT. Acute low back pain. Comparison of two conservative treatment approaches. *Med J Aust*. 1982;1(4):160-164.
14. Fritz JM, Magel JS, McFadden M, et al. Early physical therapy vs usual care in patients with recent-onset low back pain: A randomized clinical trial. *JAMA - Journal of the American Medical Association*. 2015;314(14):1459-1467.
15. Glover JR, Morris JG, Khosla T. Back pain: a randomized clinical trial of rotational manipulation of the trunk. *Br J Ind Med*. 1974;31(1):59-64.
16. Godfrey CM, Morgan PP, Schatzker J. A randomized trial of manipulation for low-back pain in a medical setting. *Spine (Phila Pa 1976)*. 1984;9(3):301-304.
17. Goertz CM, Long CR, Hondras MA, et al. Adding chiropractic manipulative therapy to standard medical care for patients with acute low back pain: results of a pragmatic randomized comparative effectiveness study. *Spine*. 2013;38(8):627-634.  
<http://onlinelibrary.wiley.com/o/cochrane/clcentral/articles/298/CN-00967298/frame.html>.
18. Grunnesjo MI, Bogefeldt JP, Svardsudd KF, Blomberg SI. A randomized controlled clinical trial of stay-active care versus manual therapy in addition to stay-active care: functional variables and pain. *J Manipulative Physiol Ther*. 2004;27(7):431-441.
19. Bogefeldt J, Grunnesjo MI, Svardsudd K, Blomberg S. Sick leave reductions from a comprehensive manual therapy programme for low back pain: the Gotland Low Back Pain Study. *Clin Rehabil*. 2008;22(6):529-541.

20. Grunnesjö MI, Bogefeldt JP, Blomberg SI, Strender LE, Svärdsudd KF. A randomized controlled trial of the effects of muscle stretching, manual therapy and steroid injections in addition to 'stay active' care on health-related quality of life in acute or subacute low back pain. *Clinical rehabilitation*. 2011;25(11):999-1010.  
<http://onlinelibrary.wiley.com/o/cochrane/clcentral/articles/578/CN-00865578/frame.html>.
21. Hadler NM, Curtis P, Gillings DB, Stinnett S. A benefit of spinal manipulation as adjunctive therapy for acute low-back pain: a stratified controlled trial. *Spine (Phila Pa 1976)*. 1987;12(7):702-706.
22. Hallegraef JM, de Greef M, Winters JC, Lucas C. Manipulative therapy and clinical prediction criteria in treatment of acute nonspecific low back pain. *Percept Mot Skills*. 2009;108(1):196-208.
23. Hancock MJ, Maher CG, Latimer J, et al. Assessment of diclofenac or spinal manipulative therapy, or both, in addition to recommended first-line treatment for acute low back pain: a randomised controlled trial. *Lancet*. 2007;370(9599):1638-1643.
24. Heymann WJ, Schloemer P, Timm J, Muehlbauer B. Spinal high-velocity low amplitude manipulation in acute nonspecific low back pain: a double-blinded randomized controlled trial in comparison with diclofenac and placebo. *Spine*. 2013;38(7):540-548.  
<http://onlinelibrary.wiley.com/o/cochrane/clcentral/articles/716/CN-00878716/frame.html>.
25. Hoiriis KT, Pflieger B, McDuffie FC, et al. A randomized clinical trial comparing chiropractic adjustments to muscle relaxants for subacute low back pain. *J Manipulative Physiol Ther*. 2004;27(6):388-398.
26. Juni P, Battaglia M, Nuesch E, et al. A randomised controlled trial of spinal manipulative therapy in acute low back pain. *Ann Rheum Dis*. 2009;68(9):1420-1427.
27. MacDonald RS, Bell CM. An open controlled assessment of osteopathic manipulation in nonspecific low-back pain. *Spine (Phila Pa 1976)*. 1990;15(5):364-370.
28. Morton JE. Manipulation in the treatment of acute low back pain. *Journal of Manual & Manipulative Therapy*. 1999;7(4):182-189.
29. Postacchini F, Facchini M, Palieri P. Efficacy of various forms of conservative treatment in low back pain: a comparative study. *Neuro-orthopedics*. 1988;6(1):28-35.
30. Rasmussen G. Manipulation in treatment of low back pain: a randomized clinical trial. *Man Med*. 1979;1:8-10.
31. Skargren EI, Carlsson PG, Oberg BE. One-year follow-up comparison of the cost and effectiveness of chiropractic and physiotherapy as primary management for back pain. Subgroup analysis, recurrence, and additional health care utilization. *Spine (Phila Pa 1976)*. 1998;23(17):1875-1883; discussion 1884.
32. Waterworth RF, Hunter IA. An open study of diflunisal, conservative and manipulative therapy in the management of acute mechanical low back pain. *N Z Med J*. 1985;98(779):372-375.
33. Furlan AD, Pennick V, Bombardier C, van Tulder M. 2009 updated method guidelines for systematic reviews in the Cochrane Back Review Group. *Spine*. 2009;34(18):1929-1941.
